# Supplementary material
Source: PubMed Central journal article supplement (PMC9969741)

Fig.1B; WB: RepID

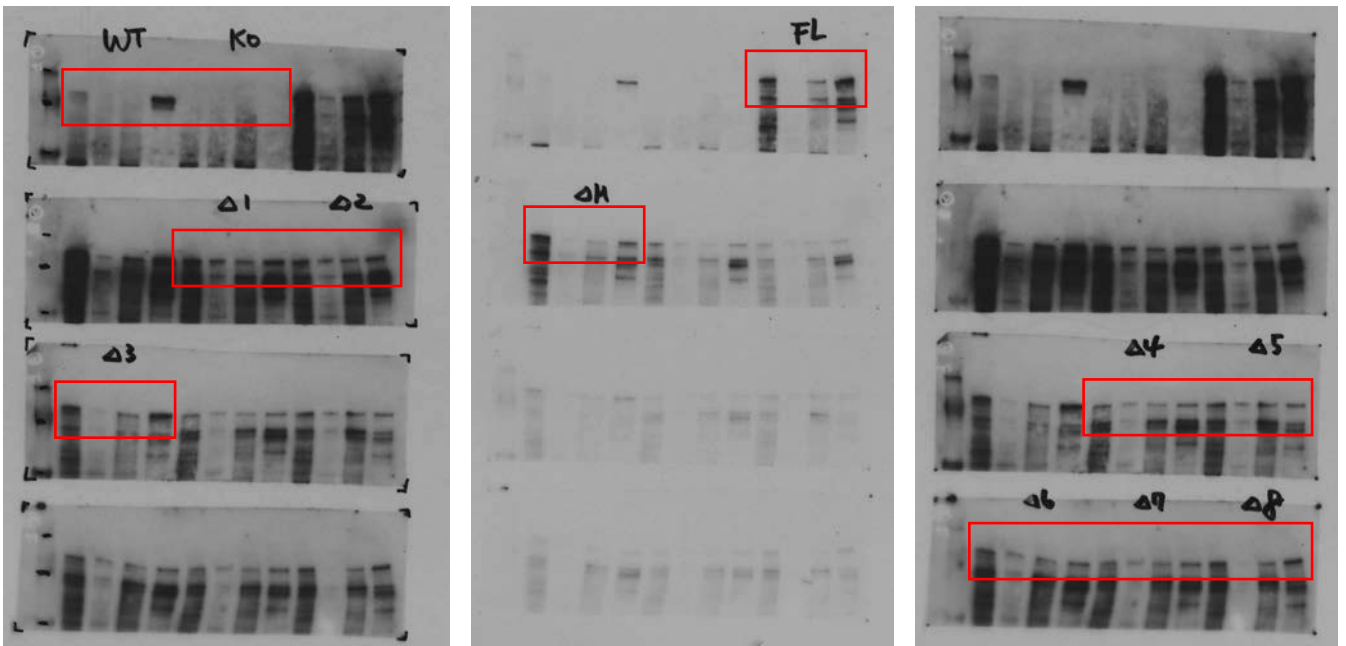

Fig.1B; WB: FLAG

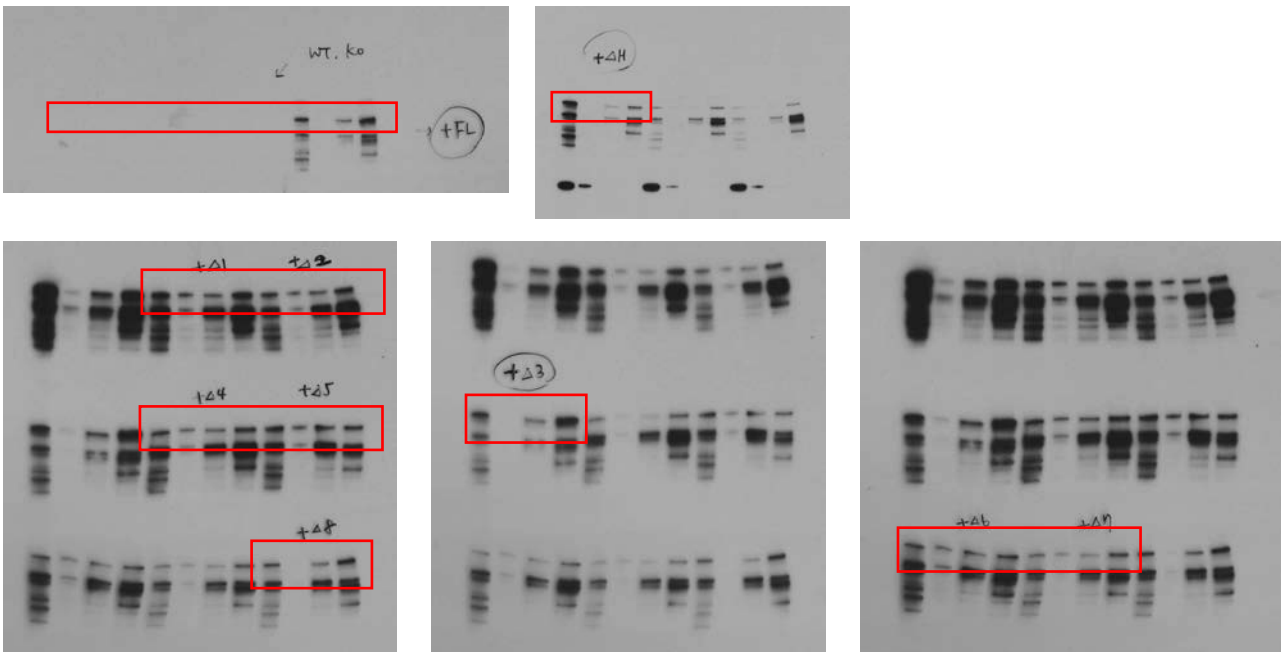

Fig.1B; WB:  $\alpha$ -tubulin

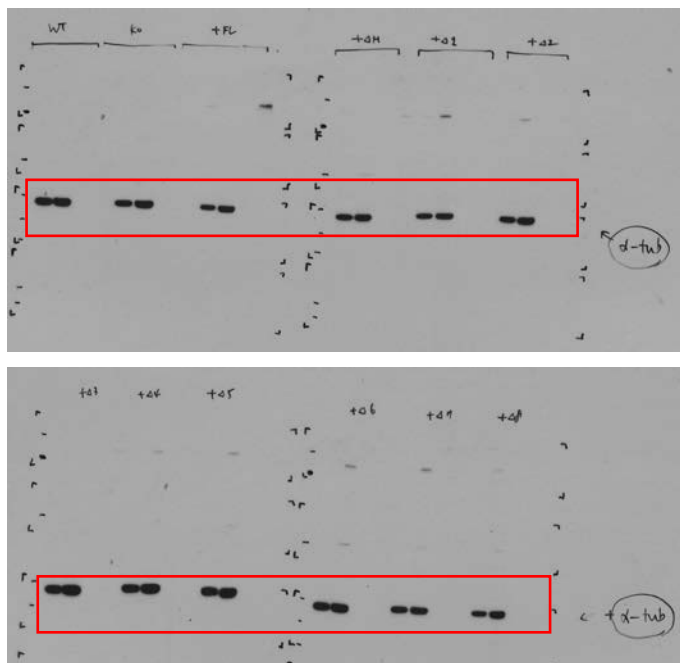

Fig.1B; WB: Histone H3

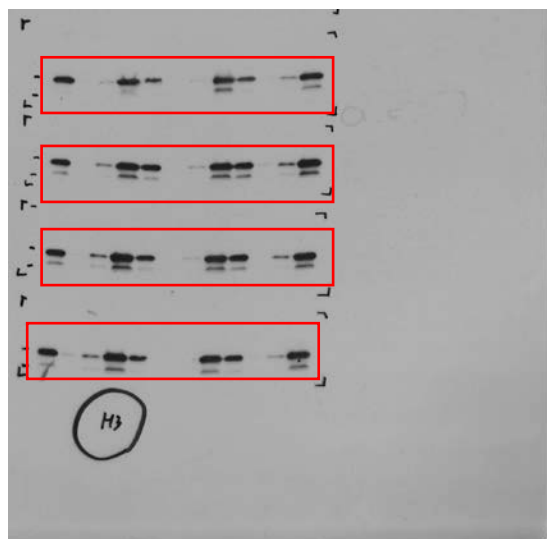

Fig.2A; WB: CUL4A

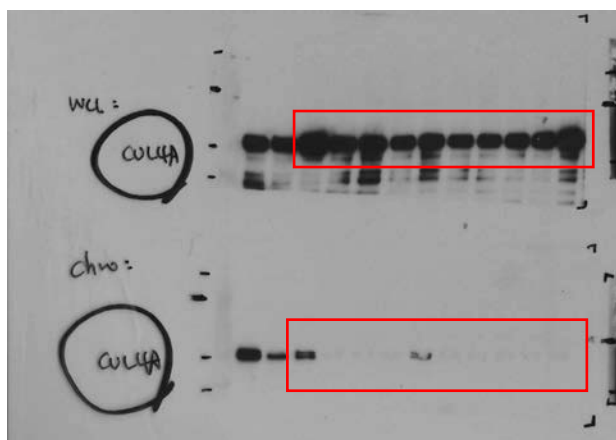

Fig.2A; WB: CUL4B

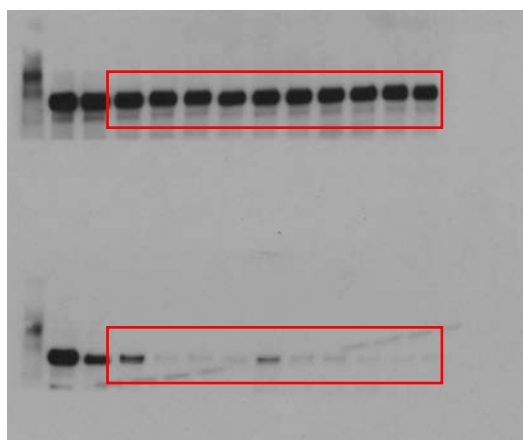

Fig.2A; WB: DDB1

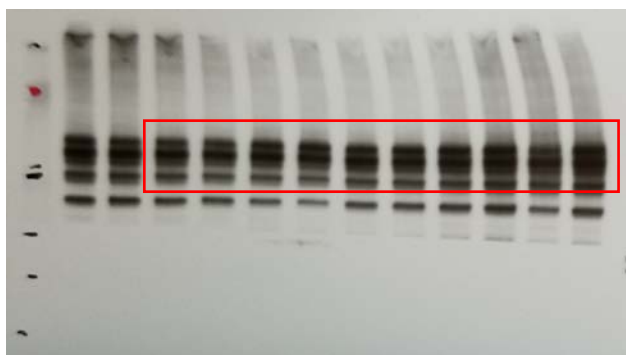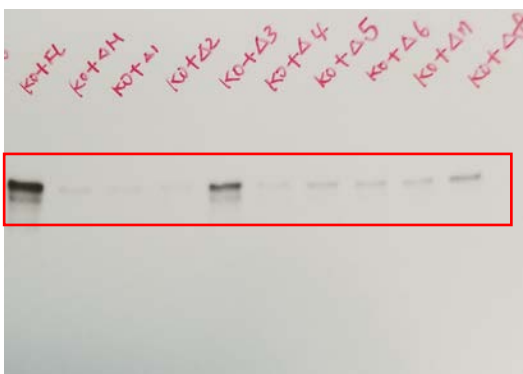

Fig.2A; WB: BUB3

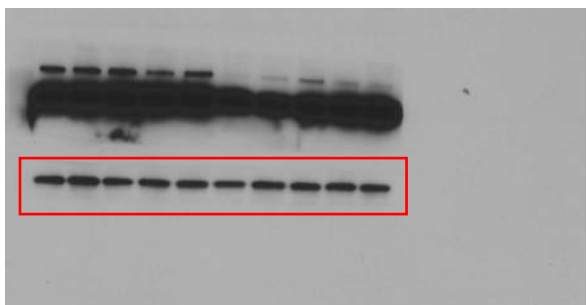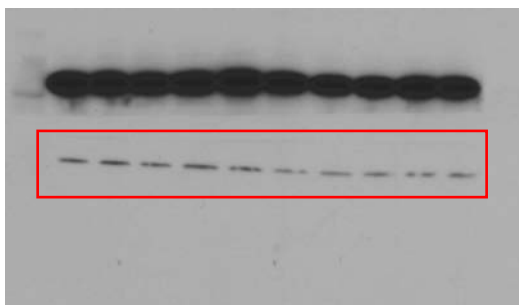

Fig.2A; WB:  $\alpha$ -tubulin

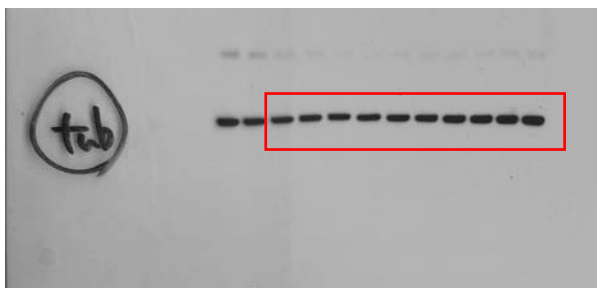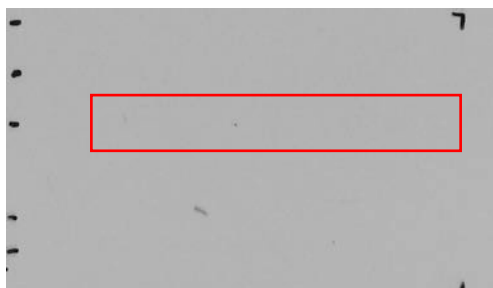

Fig.2A; WB: Histone H3

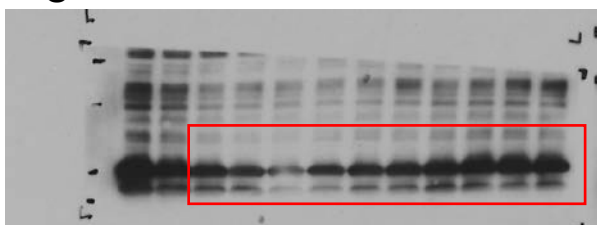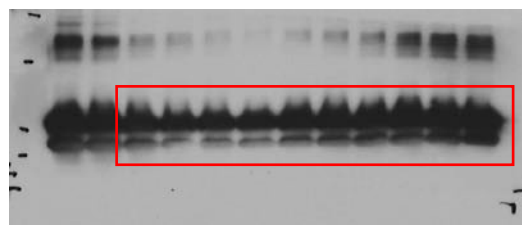

Fig.2C; WB: CUL4A

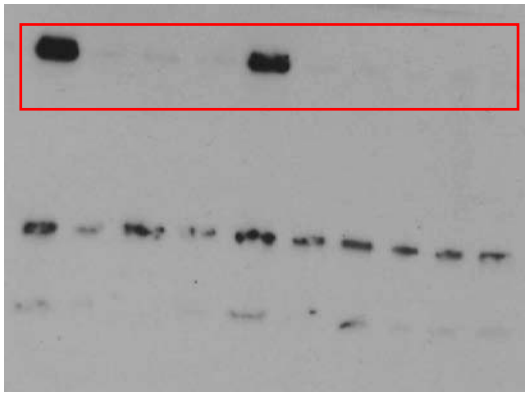

Fig.2C; WB: CUL4B

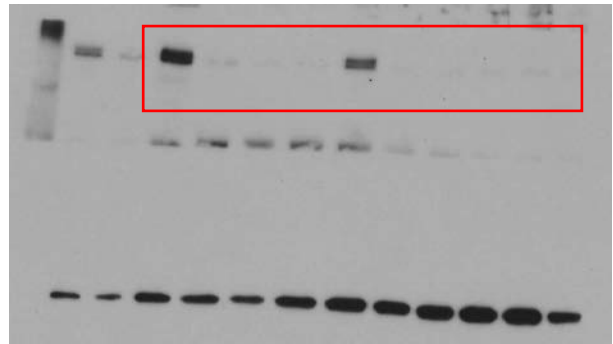

Fig.2C; WB: DDB1

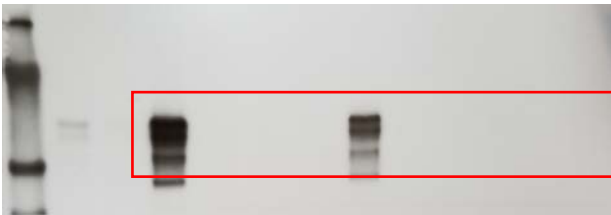

Fig.2C; WB: BUB3

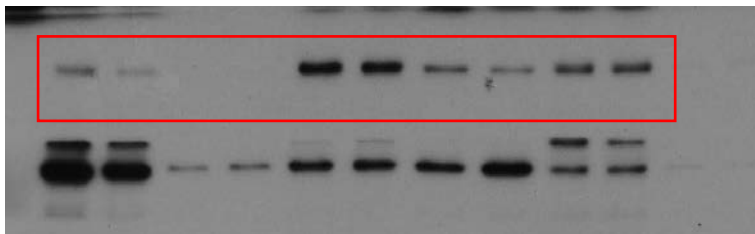

Fig.2C; WB: FLAG

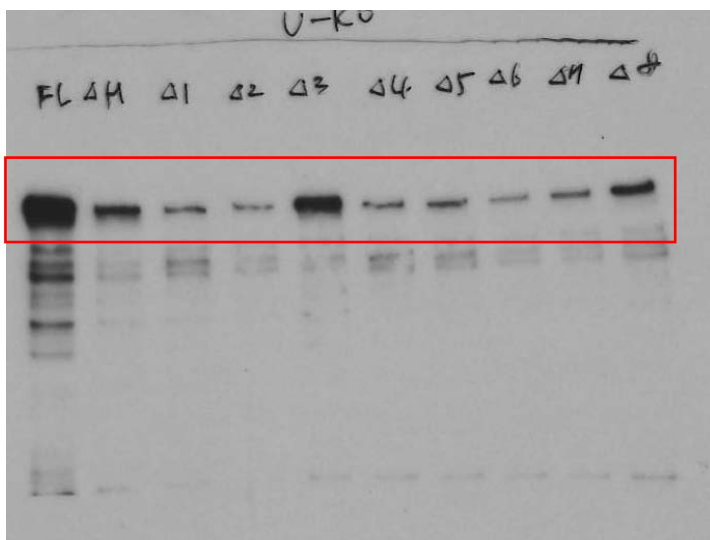

Supplement: NIHMS1870305-supplement-34171797_MiritAladjem_SuppleMaterial2.pdf [file NIHMS1870305-supplement-34171797_MiritAladjem_SuppleMaterial2.pdf]
